# Supplementary material for: Hemiurid Trematodes (Digenea: Hemiuridae) from Marine Fishes off the Coast of Rio de Janeiro, Brazil, with Novel Molecular Data
Source: MDPI journal article supplement (doi:10.3390/ani12233355), 2022-11-29
Supplement: s1 [file s1]

**Table S3.** Nucleotide comparison of *cox1* sequences of *Lecithochirium* spp. based on 443 nt long alignment. P-distance (%) is given below diagonal and the number of variable nucleotides above diagonal.

|   |                                            | 1     | 2     | 3     | 4     | 5     | 6     | 7     | 8   |
|---|--------------------------------------------|-------|-------|-------|-------|-------|-------|-------|-----|
| 1 | OP418194 <i>Lecithochirium synodi</i>      |       | 1     | 2     | 66    | 70    | 88    | 88    | 111 |
| 2 | OP918024 <i>Lecithochirium synodi</i>      | 0.23  |       | 1     | 67    | 71    | 89    | 89    | 111 |
| 3 | OP918026 <i>Lecithochirium synodi</i>      | 0.45  | 0.23  |       | 68    | 70    | 90    | 90    | 112 |
| 4 | OP918021 <i>Lecithochirium microstomum</i> | 14.90 | 15.12 | 15.35 |       | 5     | 102   | 102   | 111 |
| 5 | OP918022 <i>Lecithochirium microstomum</i> | 15.80 | 16.03 | 15.80 | 1.13  |       | 104   | 104   | 113 |
| 6 | OP418195 <i>Lecithochirium floridense</i>  | 19.86 | 20.09 | 20.32 | 23.02 | 23.48 |       | 0     | 115 |
| 7 | OP918025 <i>Lecithochirium floridense</i>  | 19.86 | 20.09 | 20.32 | 23.02 | 23.48 | 0     |       | 115 |
| 8 | OP918023 <i>Lecithochirium muraenae</i>    | 25.06 | 25.06 | 25.28 | 25.06 | 25.51 | 25.96 | 25.96 |     |
