# Supplementary material for: Hemiurid Trematodes (Digenea: Hemiuridae) from Marine Fishes off the Coast of Rio de Janeiro, Brazil, with Novel Molecular Data
Source: MDPI journal article supplement (doi:10.3390/ani12233355), 2022-11-29
Supplement: s1 [file s1]

**A**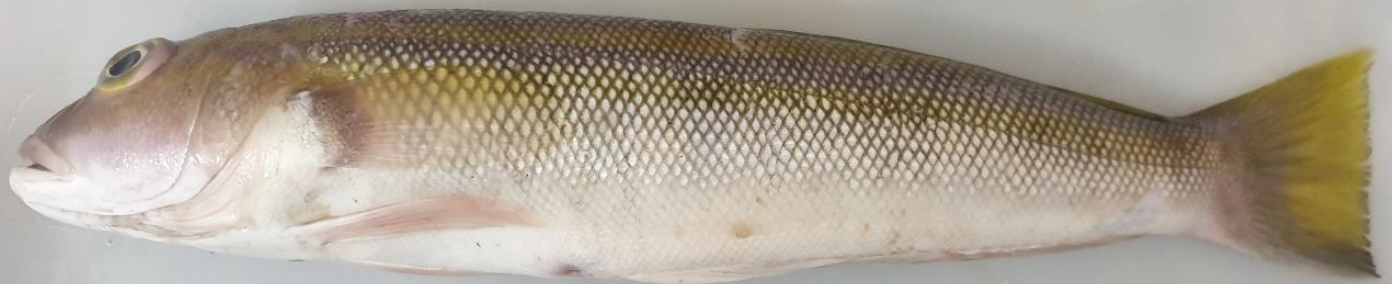

RJ36

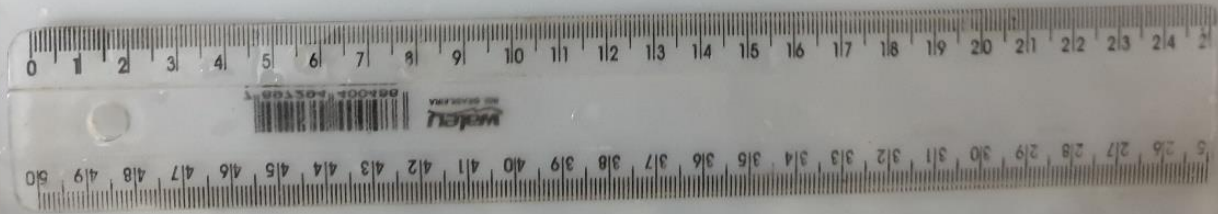**B**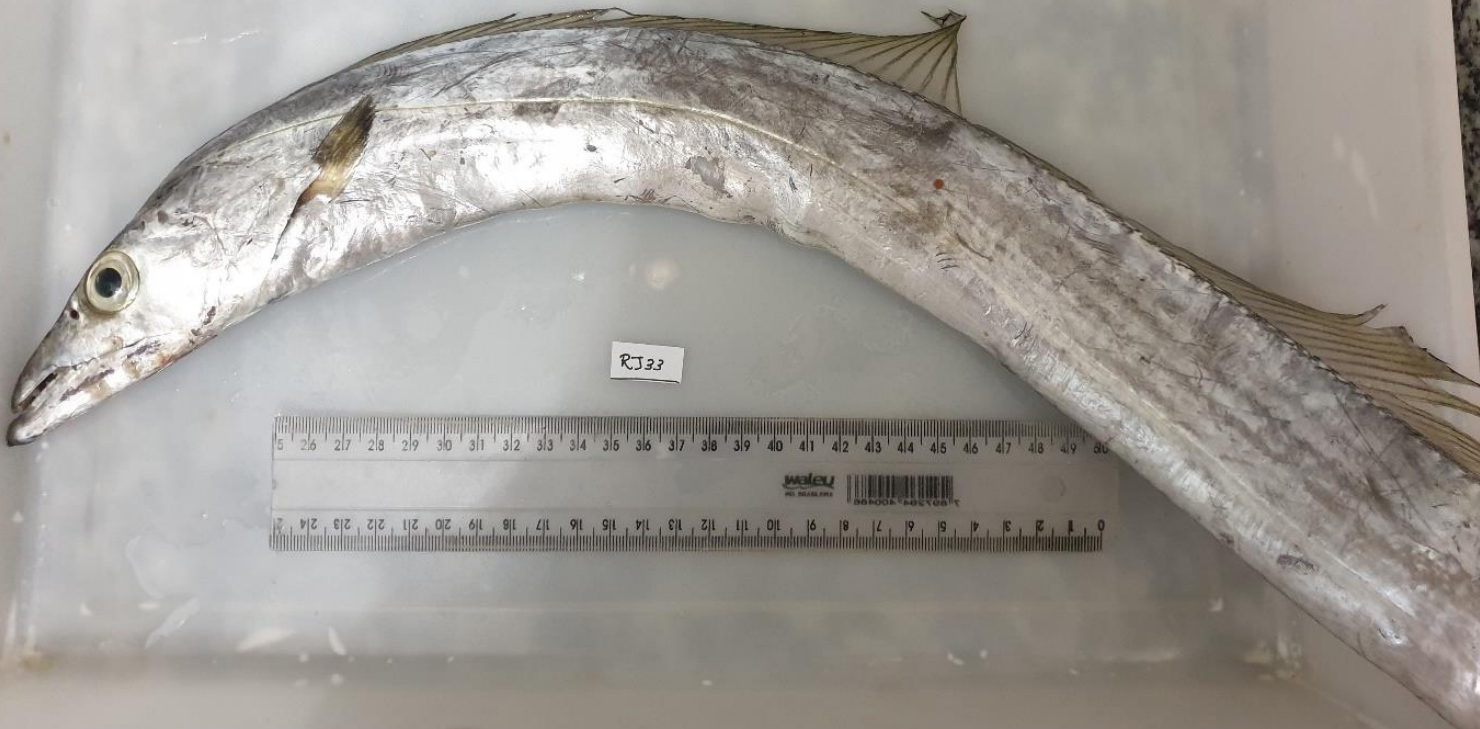

RJ33

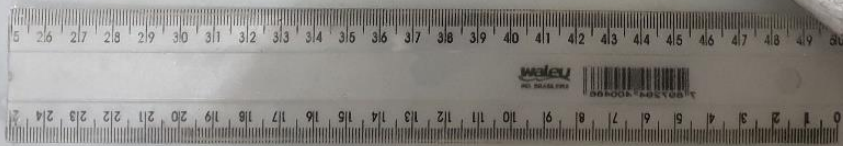

**Figure S1.** Photomicrographs of the molecular vouchers of fish: a, *Pseudopsercis numida* Miranda Ribeiro (OP925860); b, *Trichiurus lepturus* (Linnaeus) (OP905634)
