# Supplementary material for: Hemiurid Trematodes (Digenea: Hemiuridae) from Marine Fishes off the Coast of Rio de Janeiro, Brazil, with Novel Molecular Data
Source: MDPI journal article supplement (doi:10.3390/ani12233355), 2022-11-29
Supplement: s1 [file s1]

**Table S2.** Nucleotide comparison of the partial ITS2 sequences of *Lecithochirium* spp. based on 416 nt long alignment. P-distance (%) is given below diagonal and the number of variable nucleotides above diagonal.

|   |                                                    | 1     | 2     | 3     | 4     | 5     | 6   |
|---|----------------------------------------------------|-------|-------|-------|-------|-------|-----|
| 1 | OP918139 <i>Lecithochirium synodi</i>              |       | 0     | 8     | 56    | 58    | 100 |
| 2 | OP458338 <i>Lecithochirium synodi</i>              | 0     |       | 8     | 56    | 58    | 100 |
| 3 | OP918137 <i>Lecithochirium microstomum</i>         | 1.92  | 1.92  |       | 60    | 62    | 98  |
| 4 | KU527429 <i>Lecithochirium floridense</i>          | 13.53 | 13.53 | 14.49 |       | 11    | 90  |
| 5 | OP458339 <i>Lecithochirium floridense</i>          | 14.01 | 14.01 | 14.95 | 2.65  |       | 89  |
| 6 | OP918139 <i>Lecithochirium</i> cf. <i>muraenae</i> | 24.33 | 24.33 | 23.84 | 21.95 | 21.71 |     |
